# Supplementary material for: Facile synthesis of PEGylated dendritic polyurethane as unimolecular micelles for ultrasound-triggered localized drug delivery
Source: Royal Society of Chemistry journal article supplement (doi:10.1039/d1py01489g), 2021-11-23
Supplement: d1py01489g1.pdf [file d1py01489g1.pdf]

## Supporting Information

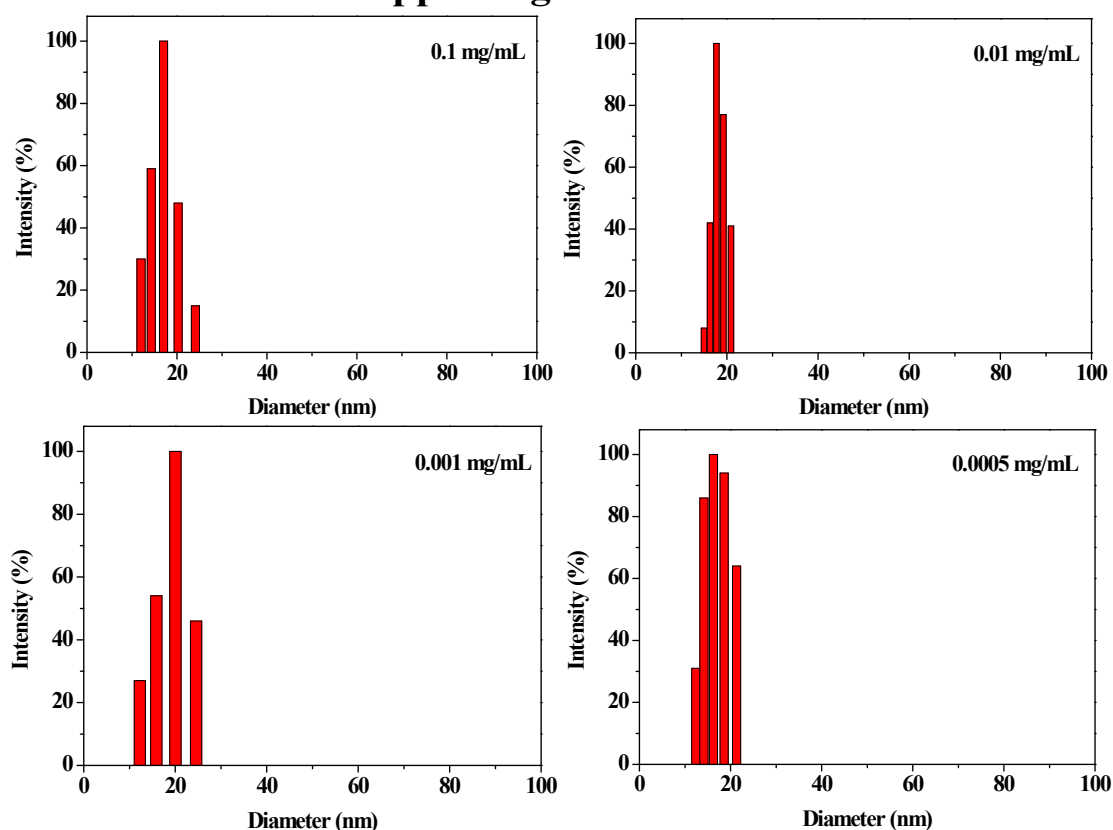

**Figure S1.** Typical hydrodynamic diameter and distribution of the Ph-DPU-PEG in water with different concentrations.

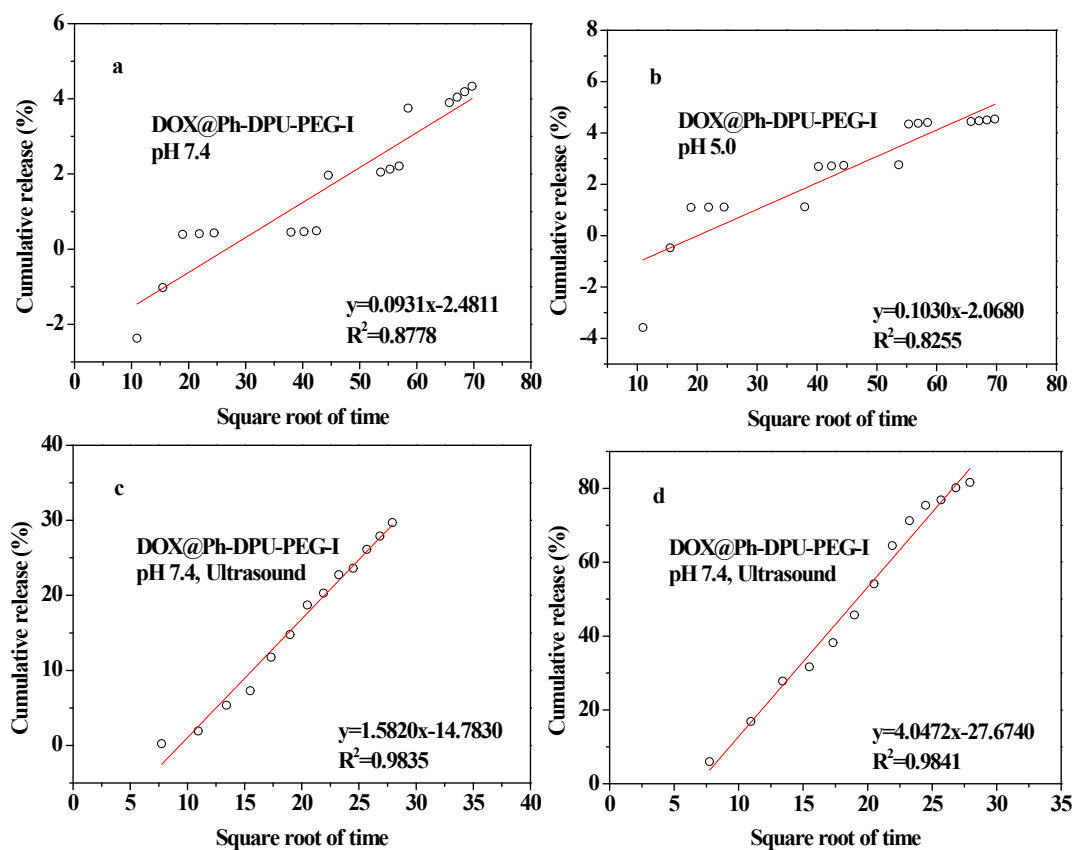

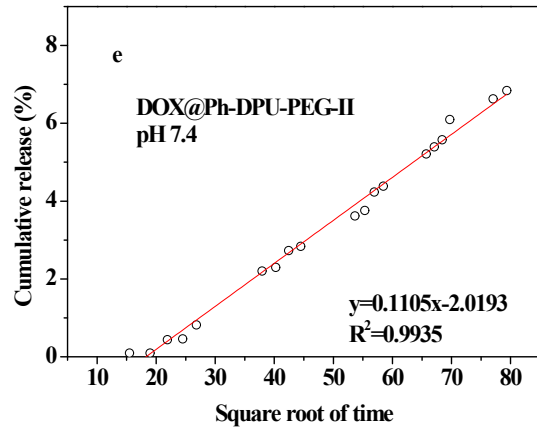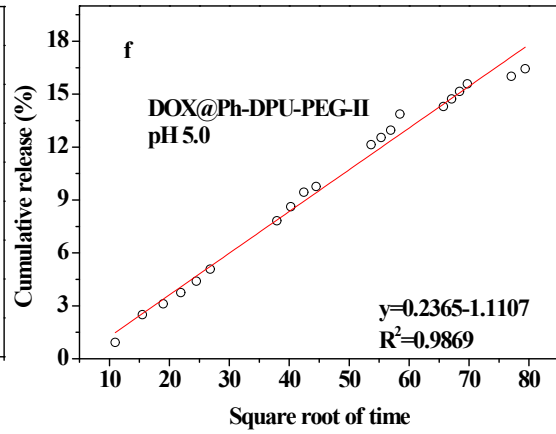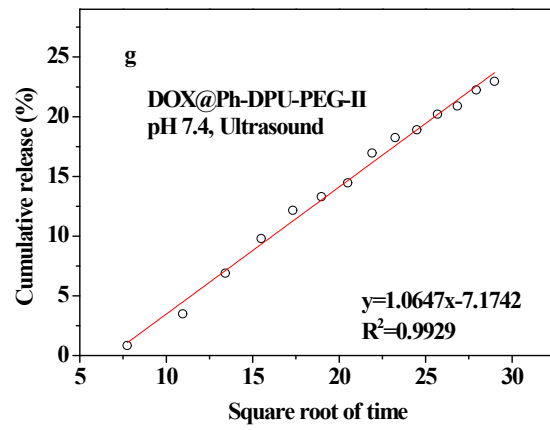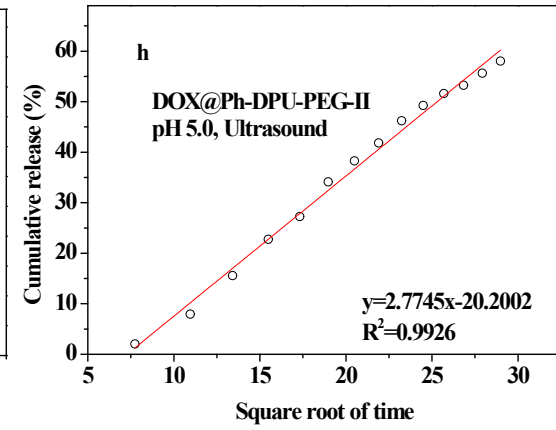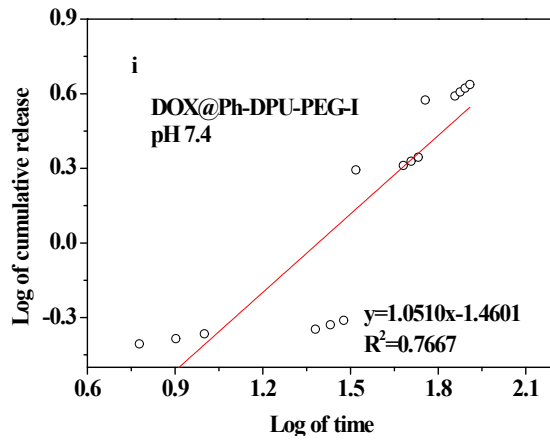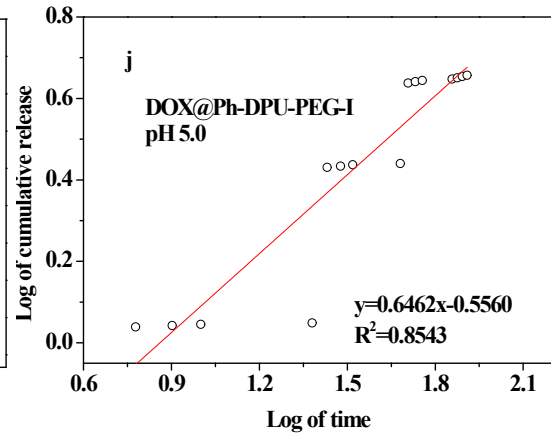

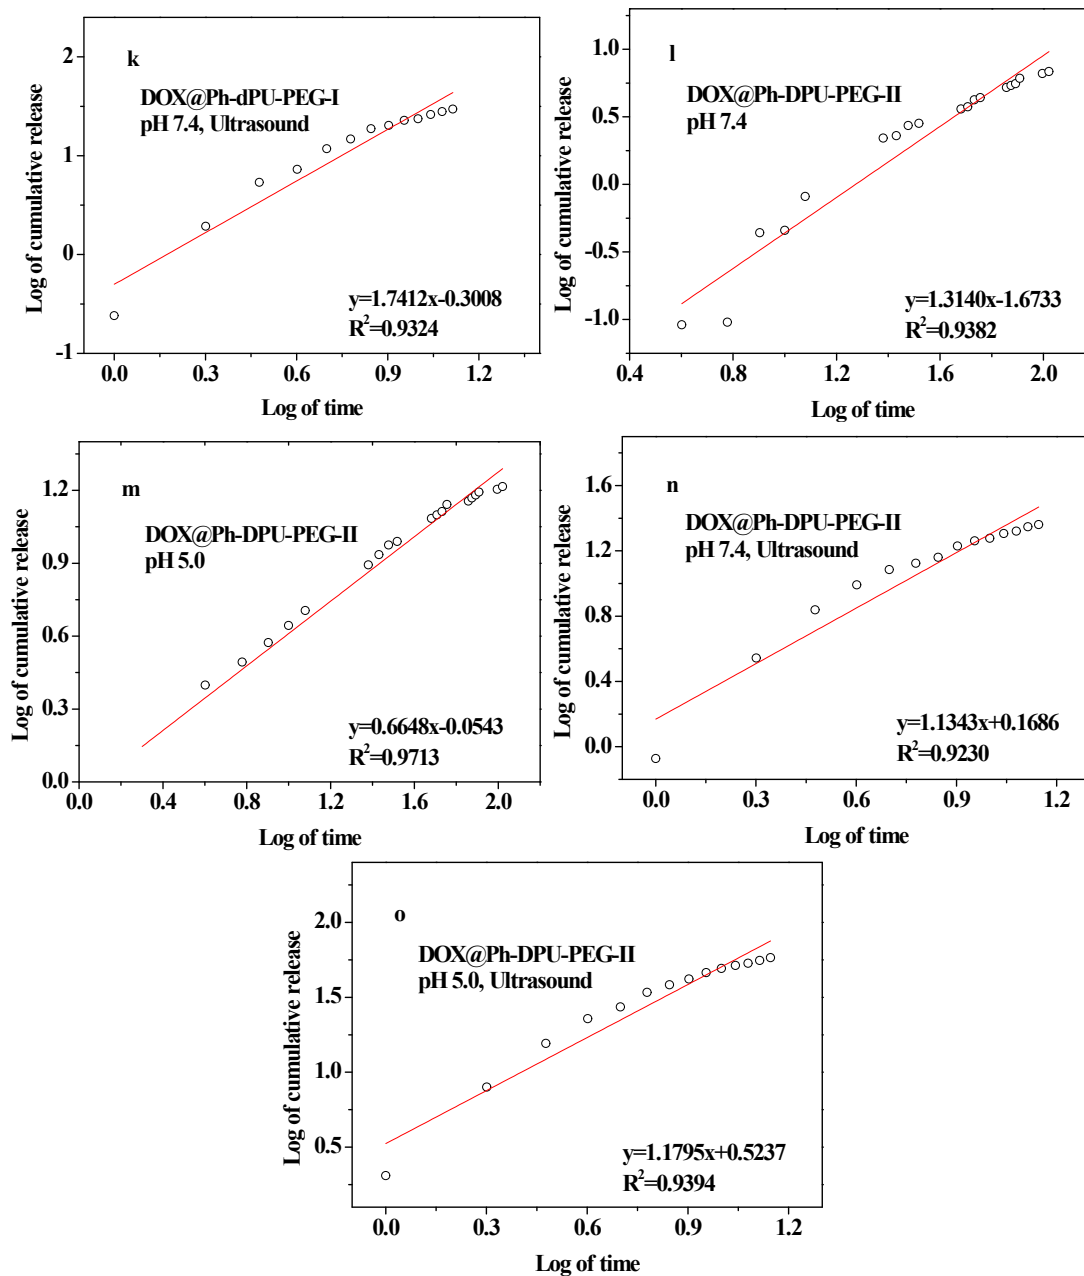

**Figure S2.** The fitted plots of the drug releasing profiles with the Higuchi and Korsmeyer-Peppas models.
